# Supplementary material for: Experimental and Theoretical Investigation of Glycol-Based Hydrogels through Waterflooding Processes in Oil Reservoirs Using Molecular Dynamics and Dissipative Particle Dynamics Simulation
Source: PubMed Central journal article supplement — ACS Omega. 2021 Nov 2;6(45):30224–40. doi: 10.1021/acsomega.1c01533 (PMC8600538; doi:10.1021/acsomega.1c01533), 2021-11-02
Supplement: ao1c01533_si_001.pdf [file ao1c01533_si_001.pdf]

**Experimental and theoretical investigation of glycol-based hydrogels through waterflooding processes in oil reservoirs using molecular dynamics and dissipative particle dynamics simulation.**

**Abdelaziz N. El-hoshoudy\***

Production Department, Egyptian Petroleum Research Institute, Naser City, Cairo, Egypt.

Corresponding author: Abdelaziz Nasr El-hoshoudy( [azizchemist@yahoo.com](mailto:azizchemist@yahoo.com))

---

(a) Forcite Analysis in case of PEG-hydrogel

Forcite Analysis - Concentration Profile

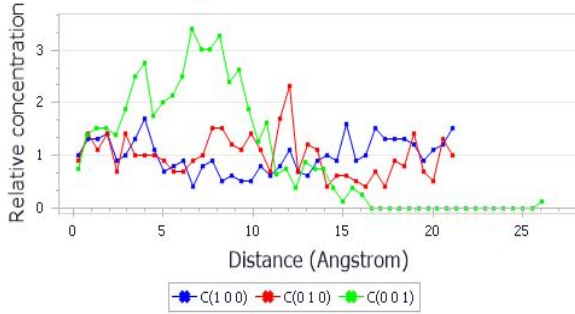

Forcite Analysis - RDF

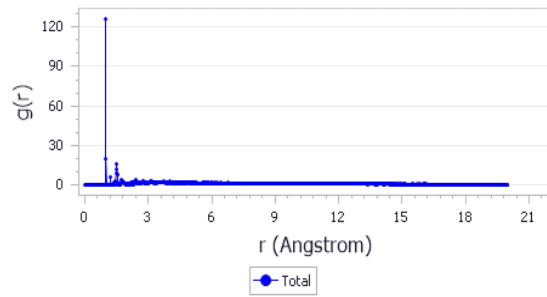

Forcite Analysis - Neutron Intensity vs. Scattering Vector

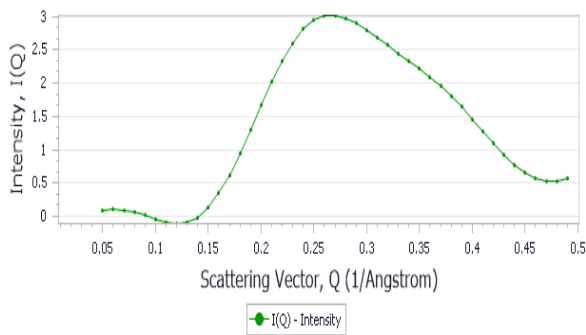

Forcite Analysis - Radius of gyration

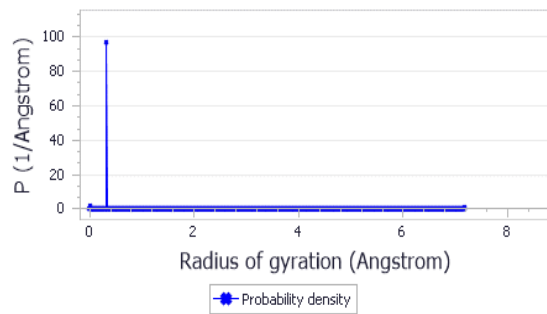

(b) Forcite Analysis in case of PPG-hydrogel

Forcite Analysis - Concentration Profile

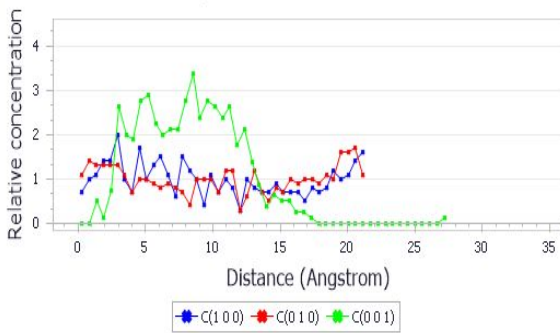

Forcite Analysis - RDF

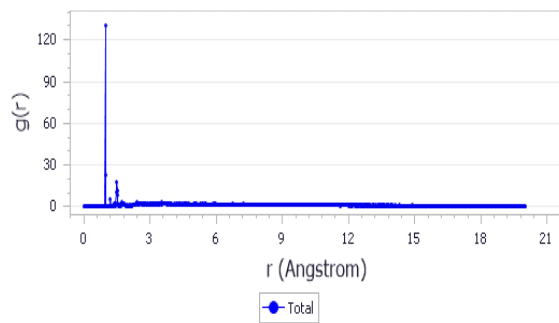

Forcite Analysis - Neutron Intensity vs. Scattering Vector

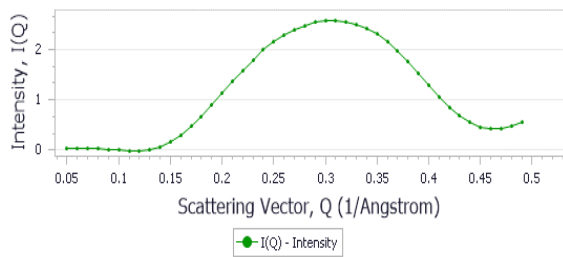

Forcite Analysis - Radius of gyration

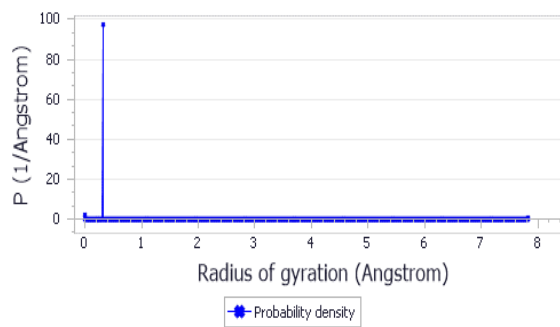

Figure S1: Concentration profile, radial distribution function (RDF), scattering, and radius of gyration obtained from Forcite Module analysis in case of PEG-and PPG-hydrogels respectively

Figure S1 indicates that an increase in the radius of gyration ( $R_g$ ) confirms that the molecules are more overextended and aligned perpendicularly towards the water/ oil boundary.

(a) DPD analysis results in the case of PEG-hydrogel

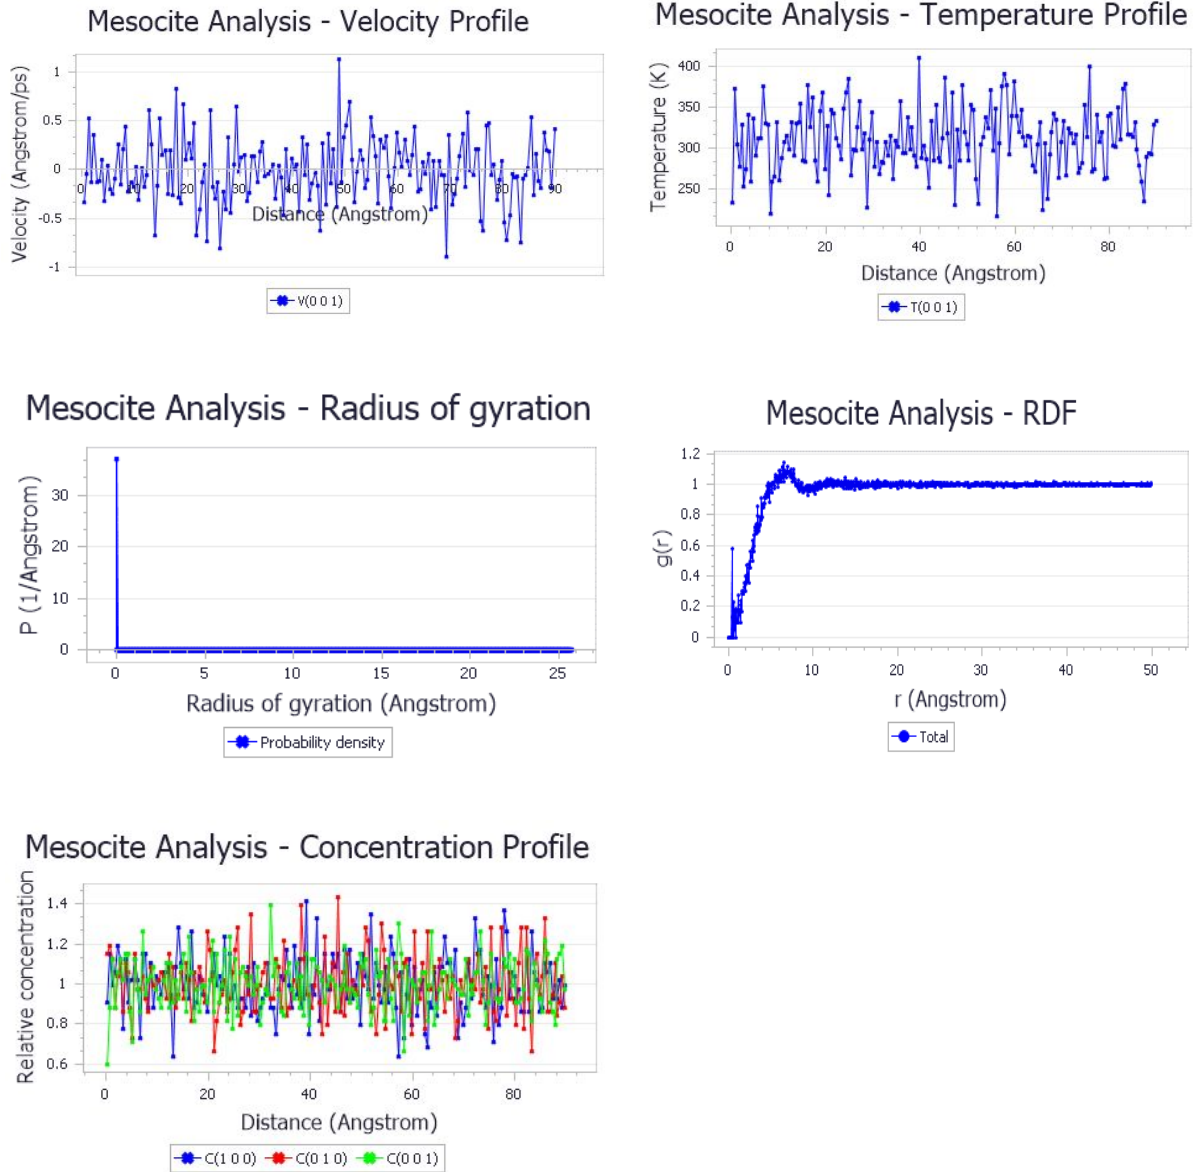

(b) DPD analysis results in the case of PPG-hydrogel

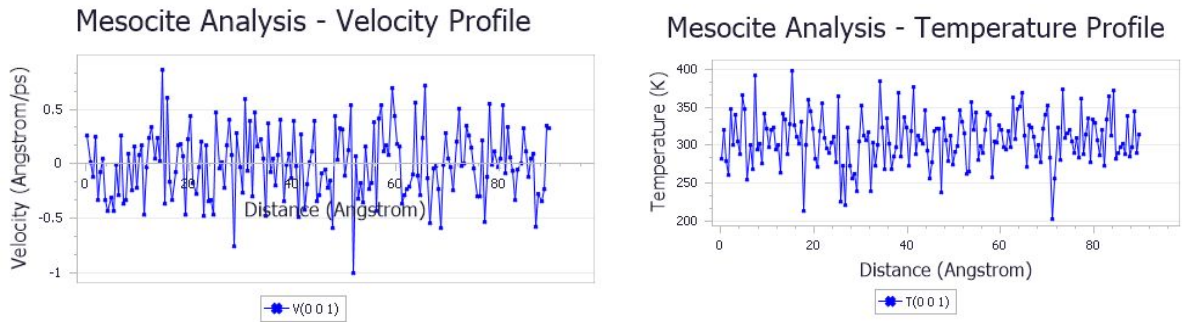

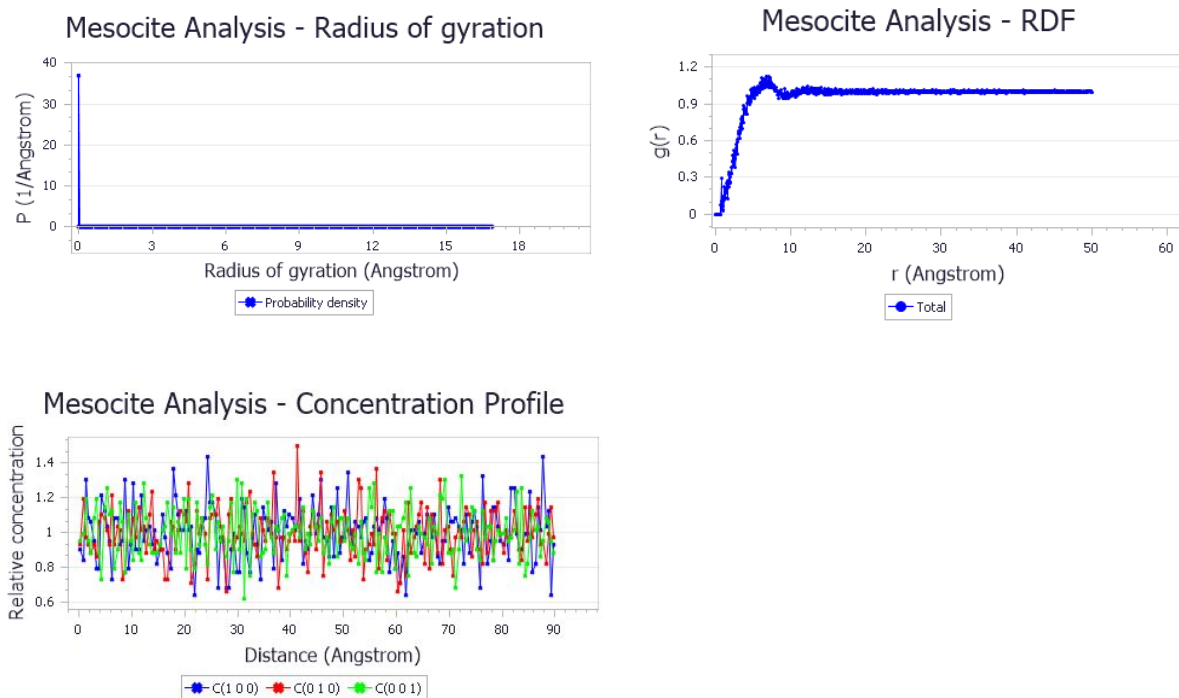

Figure S2: The DPD simulation analysis in case of PEG-and PPG-hydrogels

### 1. Spectral analysis

FT-IR bands of the **PPG and PEG surfmers** are displayed in Figures (S3 a and b), respectively. The broadbands at  $3434 - 3390\text{ cm}^{-1}$  resort to (-OH) group vibration. The intense bands at  $2981\text{ cm}^{-1}$  and  $2882\text{ cm}^{-1}$  correspond to the  $\text{CH}_2$  symmetrical stretching vibration. The broadband at  $1720$  and  $1635\text{ cm}^{-1}$  was assigned to the  $\text{C}=\text{O}$  stretching vibration of conjugated anhydride. The band at  $1635\text{ cm}^{-1}$  represents the  $\text{C}=\text{C}$  of the alkene stretching. The band at  $1453\text{ cm}^{-1}$  resorts to  $\text{CH}_2$  group scissoring. Bands at  $1381\text{ cm}^{-1}$  and  $1296\text{ cm}^{-1}$  can be attributed to  $\text{C}-\text{O}-\text{C}$  asymmetric stretching vibrations. The intense bands at  $945$  and  $815\text{ cm}^{-1}$  are assigned to the stretching vibrations of the  $\text{C}-\text{C}$  skeleton. IR spectra of poly(propyleneglycol) based hydrogels (**PPG- hydrogel**) and poly(ethylene glycol) based hydrogel (**PEG-hydrogels**) are displayed in Figures S3 c and d. They exhibit broadband in the range of  $3500-3000\text{ cm}^{-1}$ , which resorted to (-OH and -NH) stretching vibrations in AMPS and AM, respectively. The disappearance of characteristic peaks of vinyl groups indicates that the complete polymerization has been achieved<sup>1-2</sup>.

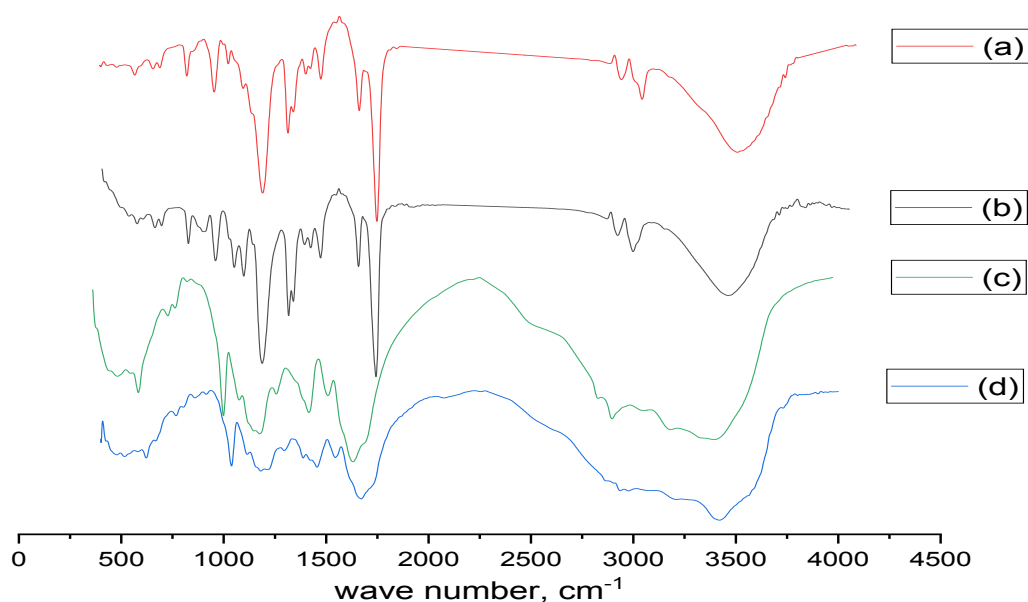

Figure S3: FT-IR spectra of (a) PPG-surfmer; (b) PEG-surfmer; (c) PPG-hydrogel; and (d) PEG-hydrogel

**<sup>1</sup>H-NMR spectra of PEG- and PPG surfmers and hydrogels**, as displayed in Figure S4, indicate that PEG- and PPG-surfmers show nearly similar chemical shifts. Moreover, PEG- and PPG- hydrogels exhibit the characteristic chemical shifts of surfmers in addition to typical chemical shifts of monomers, as summarized in Table S1. The absence of a vinyl bond shift confirms complete polymerization occurrence <sup>2</sup>.

Table S1: Summary of chemical shifts (<sup>1</sup>H-NMR)

| Cpd                    | Chemical shift ( $\delta$ , ppm)                                          | Peak identification                              |
|------------------------|---------------------------------------------------------------------------|--------------------------------------------------|
| PEG- and PPG-surfmers  | 1.93 (s, 6H, 2(-CH <sub>3</sub> ))                                        | Terminal alkyl groups                            |
|                        | 2.2- 4.2 (s, 4H, O-CH <sub>2</sub> - CH <sub>2</sub> -O)                  | characteristic chemical shifts of ethylene oxide |
|                        | 2.2- 4.4 (t, 6H, O-CH <sub>2</sub> - CH <sub>2</sub> -CH <sub>2</sub> -O) | typical chemical shifts of propylene oxide       |
|                        | 5.72 - 5.80 (s, 4H, 2 (C=CH <sub>2</sub> ))                               | characteristic chemical shifts of vinyl bond     |
| PEG- and PPG-hydrogels | 1.02 (s, 1H, -OH)                                                         | Hydroxyl group in AMPS monomer                   |
|                        | 6.60 (s, 2H, (NH <sub>2</sub> -C=O))                                      | Amide group in AM monomer                        |
|                        | 0.95- 1.80 (pendant methyl and backbone methylene groups)                 |                                                  |

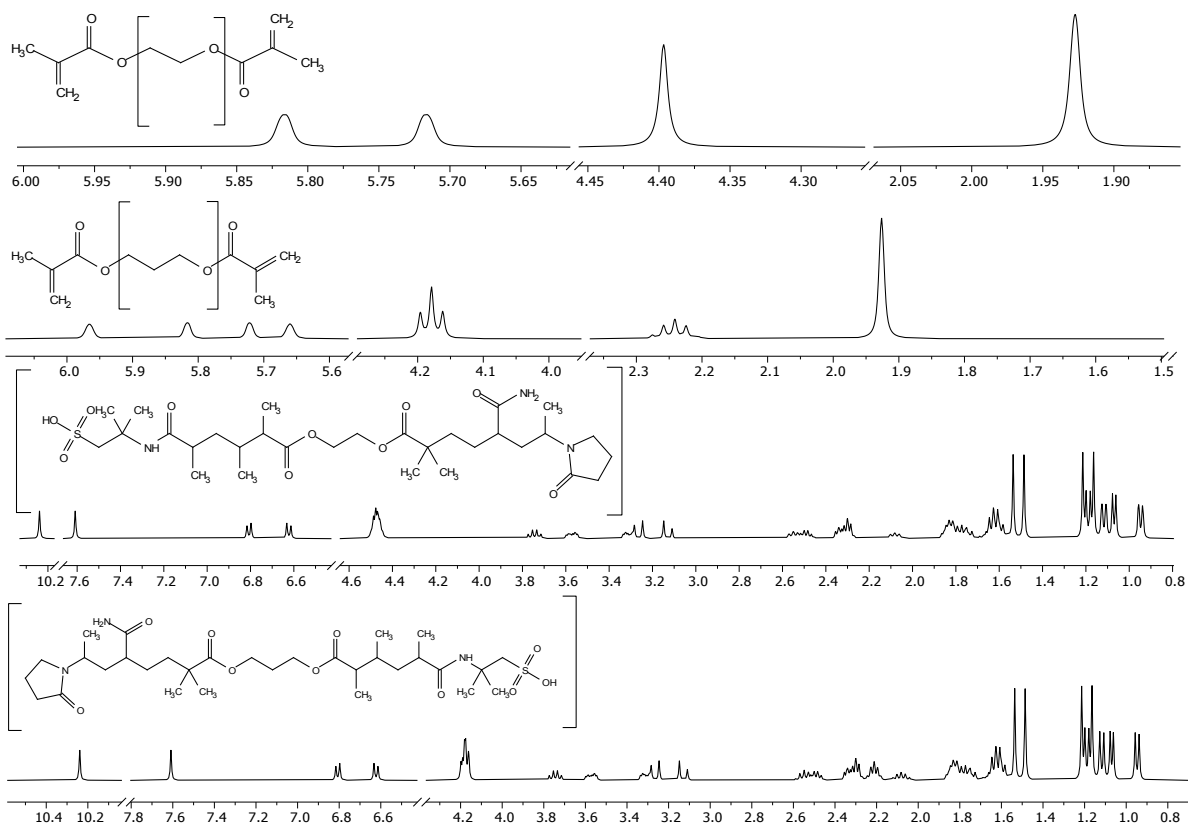

Figure S4: <sup>1</sup>H-NMR of PEG- and PPG- surfmers and hydrogels

The TGA-thermograms of the PEG- and PPG-hydrogels as displayed in Figure S5 exhibit four degradation stages; the first phase occurs at 25-250°C and is assigned to the vaporization of bounded water <sup>3-4</sup>. The second stage at 250-325°C related to the disintegration of the amide groups on the hydrogel chains <sup>5-6</sup>. The third stage at 325-385°C corresponds to the complete degradation of other side chain moieties, including sulfonic groups in AMPS and pyrrolidone rings, in addition to the breakdown of carbon-nitrogen bonds <sup>6-7</sup>. The fourth stage occurs at 385-600°C and related to the complete degradation and carbonization of the polymer skeleton <sup>6</sup>. TGA- thermograms of PEG- and PPG- hydrogels are closely associated with each other, as exhibited in Figure S5. However, at a temperature higher than 385°C, the weight loss in PPG-hydrogel is higher than the weight loss in PEG-hydrogel. This thermal behavior may resort to PPG has a longer carbon chain than PEG, so by thermal degradation, its weight loss is higher than PEG.

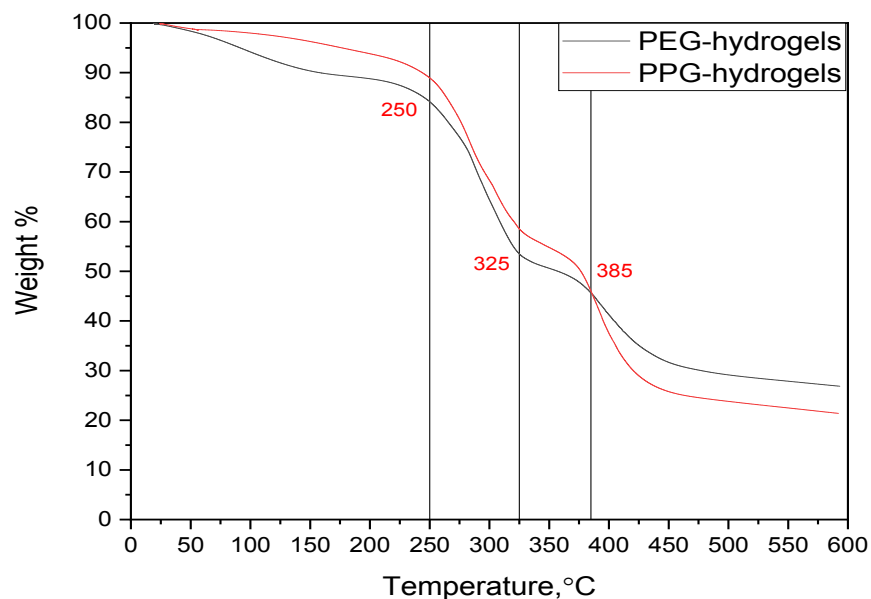

Figure S5: TGA- thermograms of PEG- and PPG hydrogels

## References

1. El-Hoshoudy, A.; Desouky, S., Synthesis and evaluation of acryloylated starch-g-poly (Acrylamide/Vinylmethacrylate/1-Vinyl-2-pyrrolidone) crosslinked terpolymer functionalized by dimethylphenylvinylsilane derivative as a novel polymer-flooding agent. *Int. J. Biol. Macromol.* **2018**, *116*, 434-442.
2. El-Hoshoudy, A., Quaternary ammonium based surfmer-co-acrylamide polymers for altering carbonate rock wettability during water flooding. *J. Mol. Liq.* **2018**, *250*, 35-43.
3. Tongwa, P.; Nygaard, R.; Bai, B., Evaluation of a nanocomposite hydrogel for water shut-off in enhanced oil recovery applications: Design, synthesis, and characterization. *J. Appl. Polym. Sci.* **2013**, *128* (1), 787-794.
4. Zolfaghari, R.; Katbab, A. A.; Nabavizadeh, J.; Tabasi, R. Y.; Nejad, M. H., Preparation and characterization of nanocomposite hydrogels based on polyacrylamide for enhanced oil recovery applications. *J. Appl. Polym. Sci.* **2006**, *100* (3), 2096-2103.
5. El-hoshoudy, A.; Hosny, R.; Fathy, M.; Abdelraheem, O.; Gomaa, S.; Desouky, S., Enhanced oil recovery using polyacrylates/ACTF crosslinked composite: Preparation, characterization and coreflood investigation. *J.Pet. Sci.Eng.* **2019**, *181*, 106236.
6. Zhou, M.; Yi, R.; Gu, Y.; Tu, H., Synthesis and evaluation of a Tetra-copolymer for oil displacement. *J.Pet. Sci.Eng.* **2019**, *179*, 669-674.
7. Wu, Q.; Gou, S.; Huang, J.; Fan, G.; Li, S.; Liu, M., Hyper-branched structure—an active carrier for copolymer with surface activity, anti-polyelectrolyte effect and hydrophobic association in enhanced oil recovery. *RSC Adv.* **2019**, *9* (29), 16406-16417.
